# Supplementary material for: TGF-β induces ST2 and programs ILC2 development
Source: PubMed Central journal article supplement (PMC6946674; doi:10.1038/s41467-019-13734-w), 2020-01-07
Supplement: 41467_2019_13734_MOESM1_ESM.pdf [file 41467_2019_13734_MOESM1_ESM.pdf]

## Supplementary figures and tables

### **TGF- $\beta$ induces ST2 and programs ILC2 development**

Li Wang<sup>1,2\*</sup>, Jun Tang<sup>1,2,3\*</sup>, Xia Yang<sup>1,2\*</sup>, Peter Zanvit<sup>1\*</sup>, Kairong Cui<sup>4</sup>, Wai Lim Wang<sup>4</sup>,  
Wenwen Jin<sup>1</sup>, Dunfang Zhang<sup>1</sup>, Nathan Goldberg<sup>1</sup>, Alexander Cain<sup>1</sup>, Bing Ni<sup>2</sup>, Keji  
Zhao<sup>4</sup>, Yuzhang Wu<sup>2</sup>, WanJun Chen<sup>1</sup>

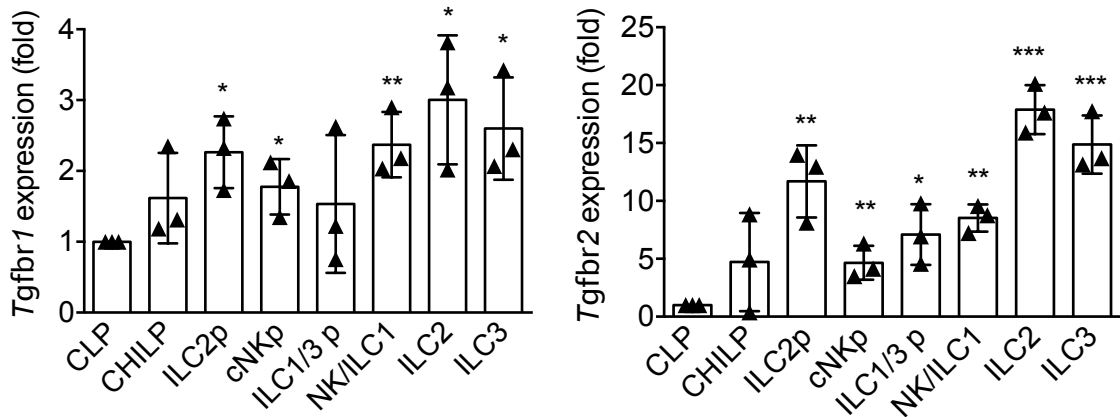

**Supplementary Figure 1. *Tgfb1* and *Tgfb2* are expressed in ILC precursors and mature ILC cells.**

Quantitative RT-PCR analysis of *Tgfb1* and *Tgfb2* expression in indicated cell populations isolated by cell sorting; results were normalized to *Hprt*. Data are pooled from 3 independent experiments and are presented as mean  $\pm$  SEM (\*  $p < 0.05$ , \*\*  $p < 0.01$ , \*\*\*  $p < 0.001$ )

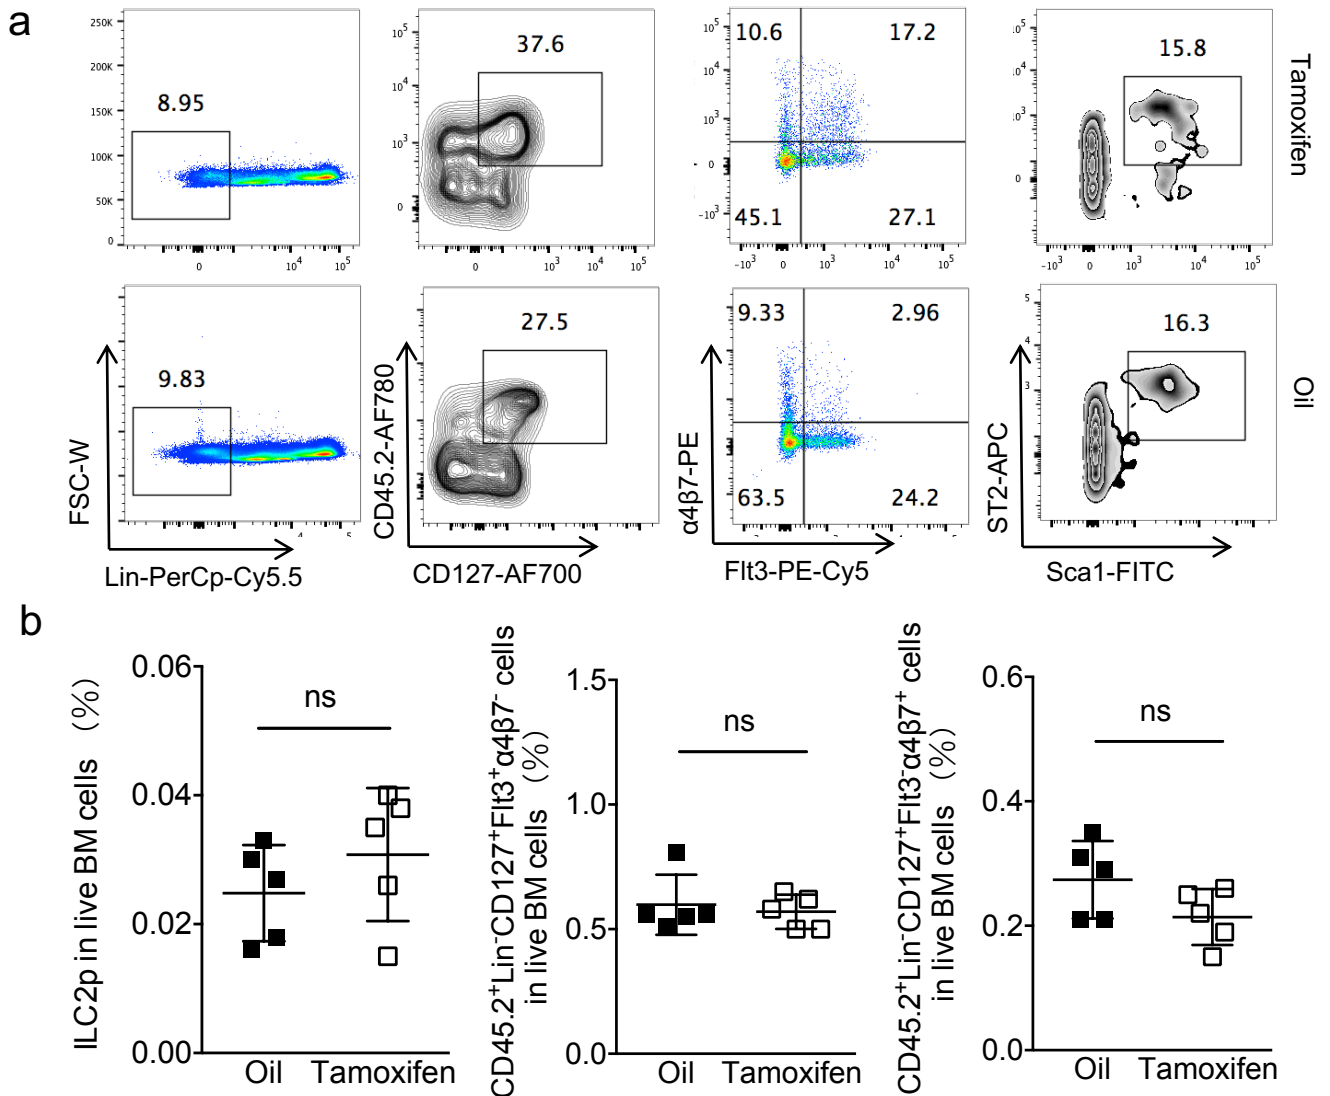

**Supplementary Figure 2. No effect of Tamoxifen treatment on the bone marrow composition of *Tgfb2<sup>fl/fl</sup>*ER-Cre<sup>+</sup> mice.**

- (a) Flow cytometry analysis of the frequency of CLP (CD45.2<sup>+</sup>Lin<sup>-</sup>CD127<sup>+</sup>Fit3<sup>+</sup>α4β7<sup>-</sup>), ILC-committed progenitor (CD45.2<sup>+</sup>Lin<sup>-</sup>CD127<sup>+</sup>Fit3<sup>-</sup>α4β7<sup>+</sup>) as well as ILC2 lineage-committed precursor (ILC2p) (CD45.2<sup>+</sup>Lin<sup>-</sup>CD127<sup>+</sup>Fit3<sup>-</sup>α4β7<sup>+</sup>Sca1<sup>+</sup>ST2<sup>+</sup>) in bone marrow of oil or tamoxifen-treated *Tgfb2<sup>fl/fl</sup>*ER-Cre<sup>+</sup> mice. Numbers indicate percentage of gated populations.
- (b) Summarizing data showing frequency of ILC2p cells, CLP and ILC-committed progenitors in the bone marrow (n=5 mice per group). Significance was determined by Student's t-test (ns: no significance).

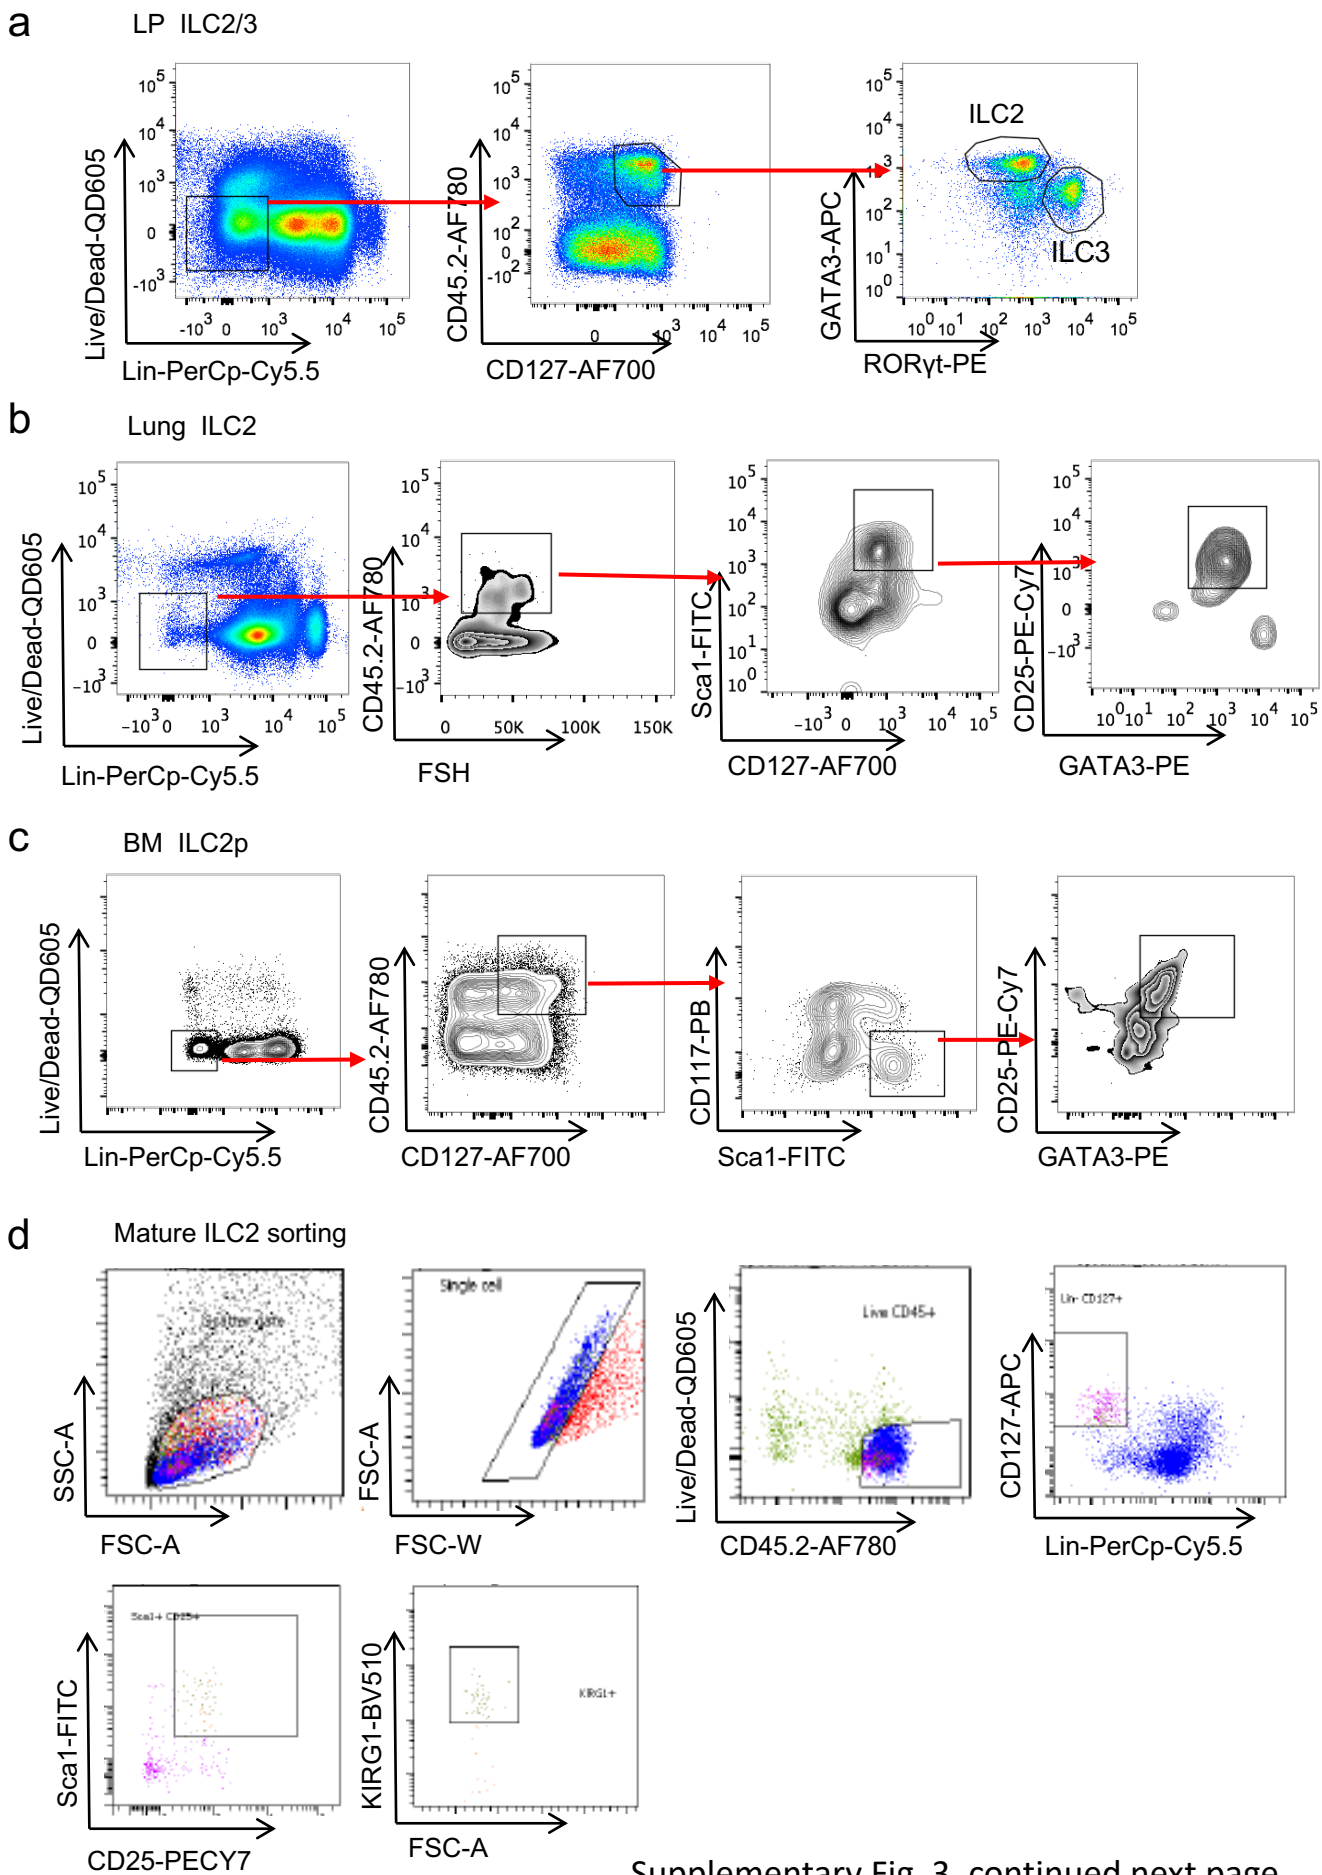

e

BM CHILP/ ILC2p

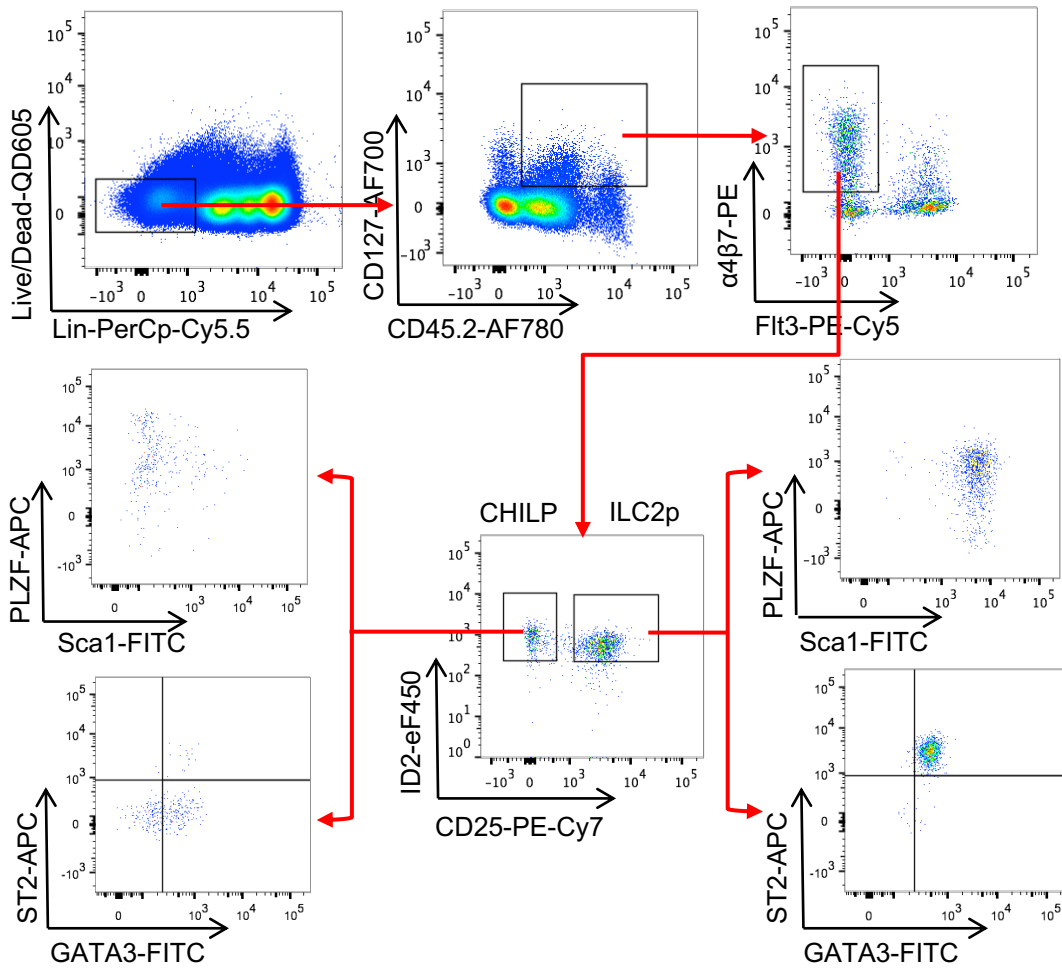

### Supplementary Figure 3 Gating strategies for identification or sorting of lamina propria or bone marrow ILC2/ILC3 and ILC2p cells

Gating strategy for identifying: (a) CD45.2<sup>+</sup>Lin<sup>-</sup>CD127<sup>+</sup>GATA3<sup>+</sup> ILC2s and CD45.2<sup>+</sup>Lin<sup>-</sup>CD127<sup>+</sup>RORγt<sup>+</sup> ILC3s in the lamina propria (LP), (b) CD45.2<sup>+</sup>Lin<sup>-</sup>CD127<sup>+</sup>Sca1<sup>+</sup>CD25<sup>+</sup>GATA3<sup>+</sup> ILC2 in the lung and (c) CD45.2<sup>+</sup>Lin<sup>-</sup>CD127<sup>+</sup> CD117<sup>-</sup>Sca1<sup>+</sup>CD25<sup>+</sup>GATA3<sup>+</sup> ILC2-lineage-committed precursor (ILC2p) in the bone marrow (BM) by flow cytometry. (d) Gating strategy for sorting of the mature peripheral ILC2 cells (CD45.2<sup>+</sup>Lin<sup>-</sup>Sca1<sup>+</sup>CD25<sup>+</sup>KLRG1<sup>+</sup>) (e) Gating strategy for identifying and sorting CHILP and ILC2p in the BM by flow cytometry.

# Supplementary Figure 4

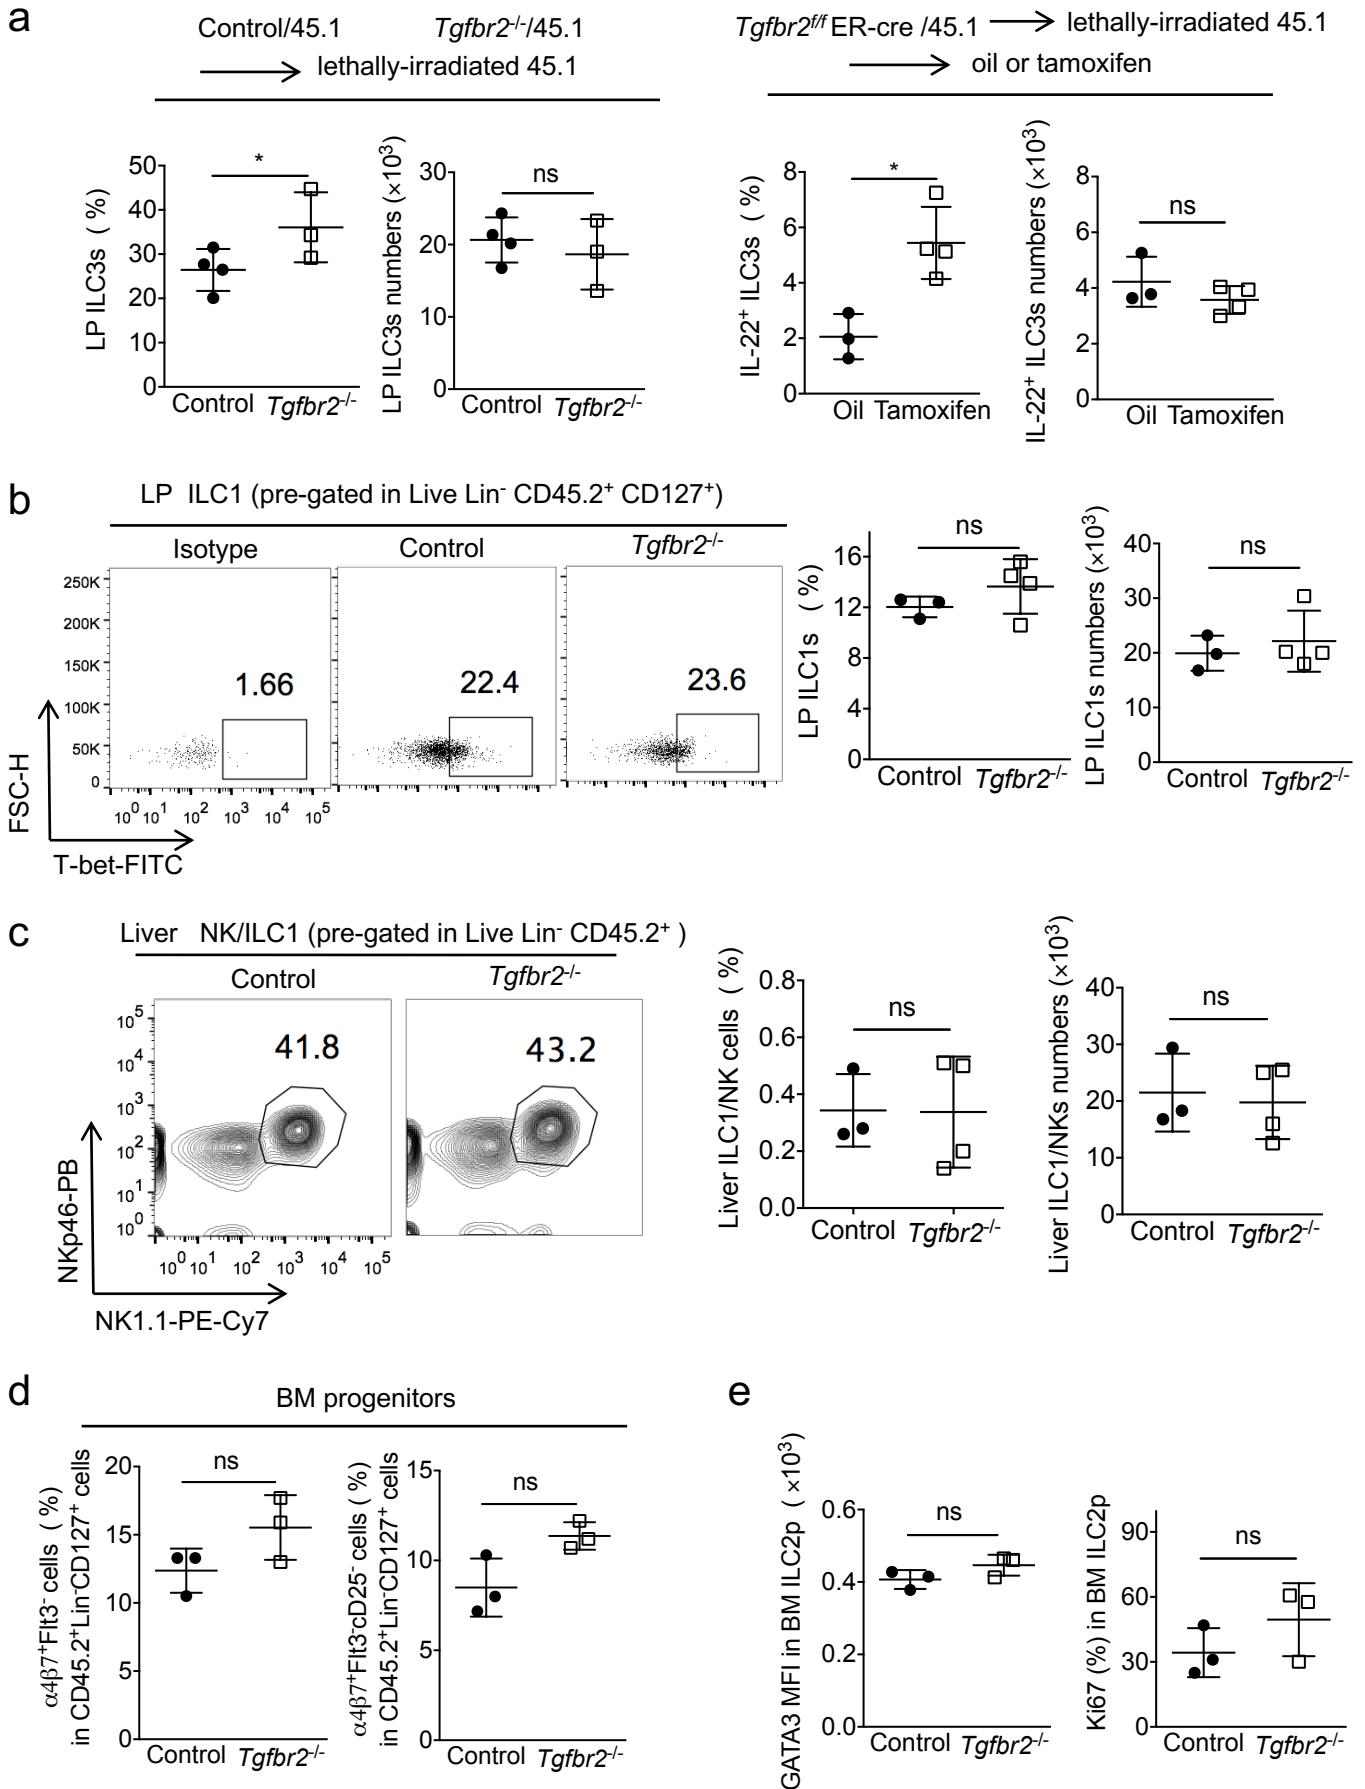

**Supplementary Figure 4. T $\beta$ R2 deletion has no effect on ILC3 and ILC1/NK cells in the periphery or the upstream of ILC2p in the BM.**

- (a) Summarized frequency and total numbers of CD45.2<sup>+</sup> ILC3 cells in the LP of Control/CD45.1 and *Tgfb $\beta$ 2*<sup>-/-</sup>/CD45.1 BM chimeras, and *Tgfb $\beta$ 2*<sup>fl/fl</sup>ER-Cre<sup>+</sup>/45.1 BM chimeras post-treated with tamoxifen or oil (n=3-4 mice per group).
  - (b) Representative FACS plot and summarized frequency and total number of Tbet<sup>+</sup> ILC1s among CD45.2<sup>+</sup>Lin<sup>-</sup>CD127<sup>+</sup> cells in the LP from Control/CD45.1 and *Tgfb $\beta$ 2*<sup>-/-</sup>/CD45.1 BM chimeras (n=3-4 mice per group).
  - (c) Flow cytometry profiles and summary of the frequency and absolute number of NK1.1<sup>+</sup>NKp46<sup>+</sup> cells among CD45.2<sup>+</sup>Lin<sup>-</sup> cells in the liver from Control/CD45.1 and *Tgfb $\beta$ 2*<sup>-/-</sup>/CD45.1 BM chimeras (n=3-4 mice per group).
  - (d) Summary of the frequency of  $\alpha$ 4 $\beta$ 7<sup>+</sup>Flt3<sup>-</sup> progenitor cells and  $\alpha$ 4 $\beta$ 7<sup>+</sup>Flt3<sup>-</sup>CD25<sup>-</sup> progenitor cells among CD45.2<sup>+</sup>Lin<sup>-</sup>CD127<sup>+</sup> cells in the BM of Control/CD45.1 and *Tgfb $\beta$ 2*<sup>-/-</sup>/CD45.1 BM chimeras (n=3 mice per group).
  - (e) MFI of GATA3 and frequency of Ki67 expression in ILC2p in the BM of Control/CD45.1 and *Tgfb $\beta$ 2*<sup>-/-</sup>/CD45.1 BM chimeras (n=3 mice per group).
- All data are representative of two independent experiments. Data are represented as mean  $\pm$  SD; \*p<0.05, ns: no significance (Student's t-test).

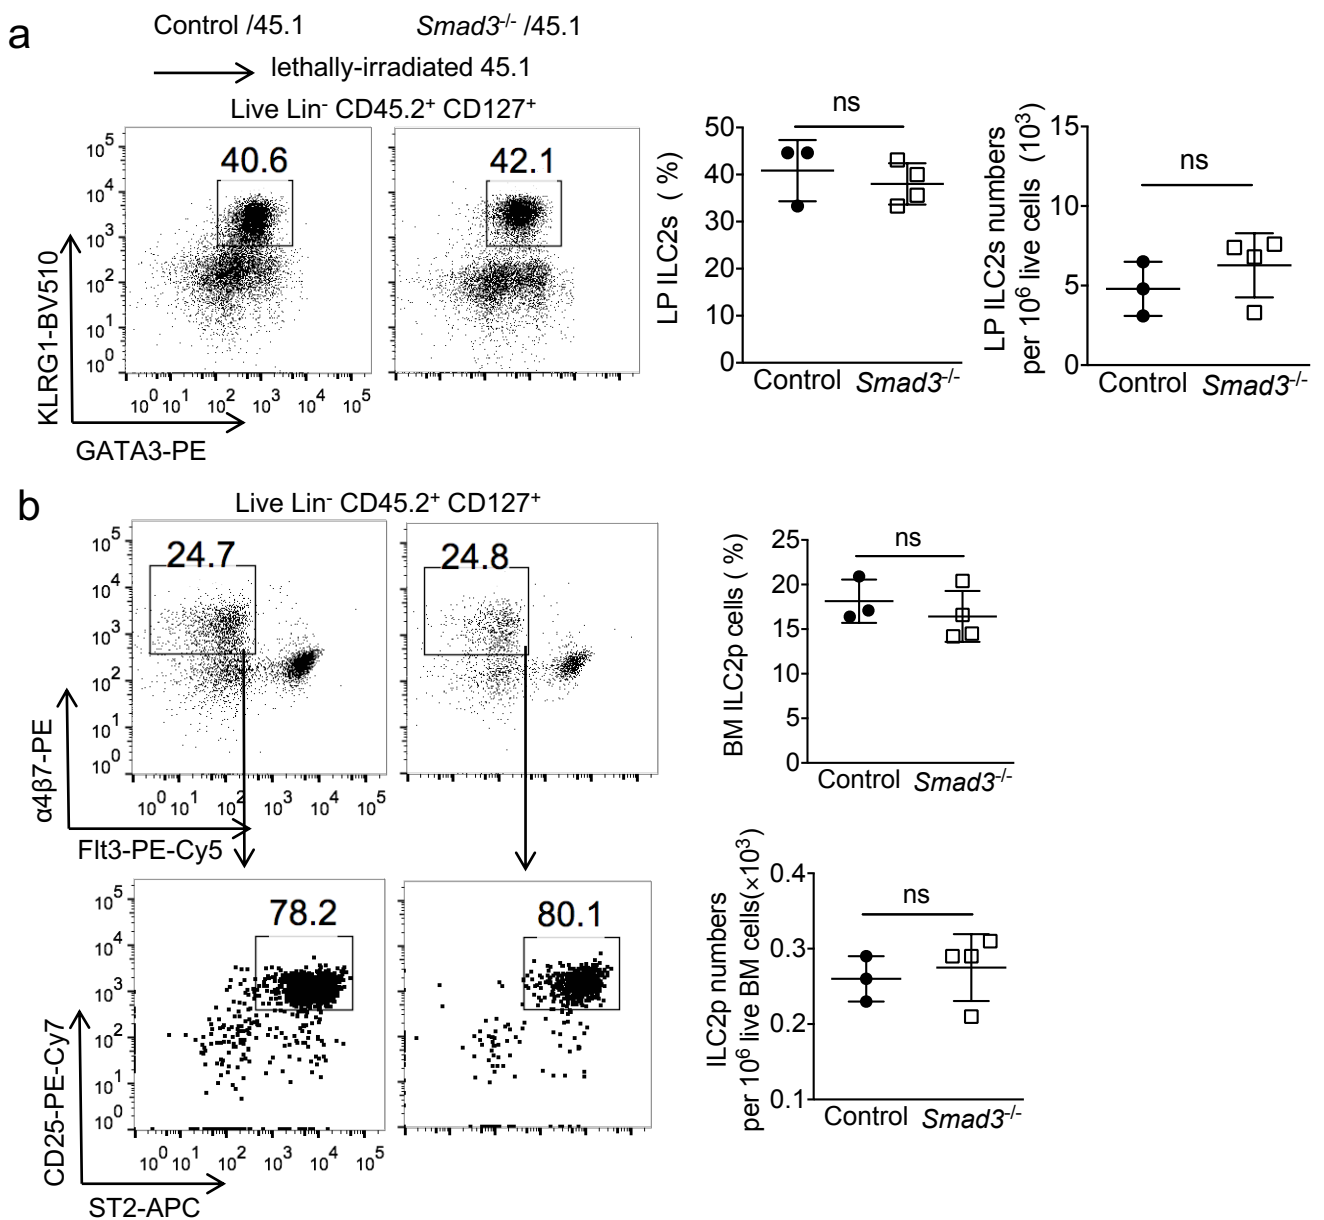

**Supplementary Figure 5. Intrinsic SMAD3 deficiency has no effect on the ILC2 generation.**

(a) Representative FACS plots and summarized frequency and total number of KLRG1<sup>+</sup>GATA3<sup>+</sup> ILC2 cells among CD45.2<sup>+</sup>Lin<sup>-</sup>CD127<sup>+</sup> cells in the LP of Control/CD45.1 and *Smad3*<sup>-/-</sup>/CD45.1 BM chimeras (n=3-4 mice per group).

(b) Representative FACS plots and summarized frequency and total number of  $\alpha_4\beta_7$ <sup>+</sup>Flt3<sup>-</sup>CD25<sup>+</sup>ST2<sup>+</sup> ILC2p cells among CD45.2<sup>+</sup>Lin<sup>-</sup>CD127<sup>+</sup> cells in the BM of Control/CD45.1 and *Smad3*<sup>-/-</sup> /CD45.1 BM chimeras (n=3-4 mice per group).

Data are representative of two independent experiments and shown as mean  $\pm$  SD; ns: no significance (Student's t-test).



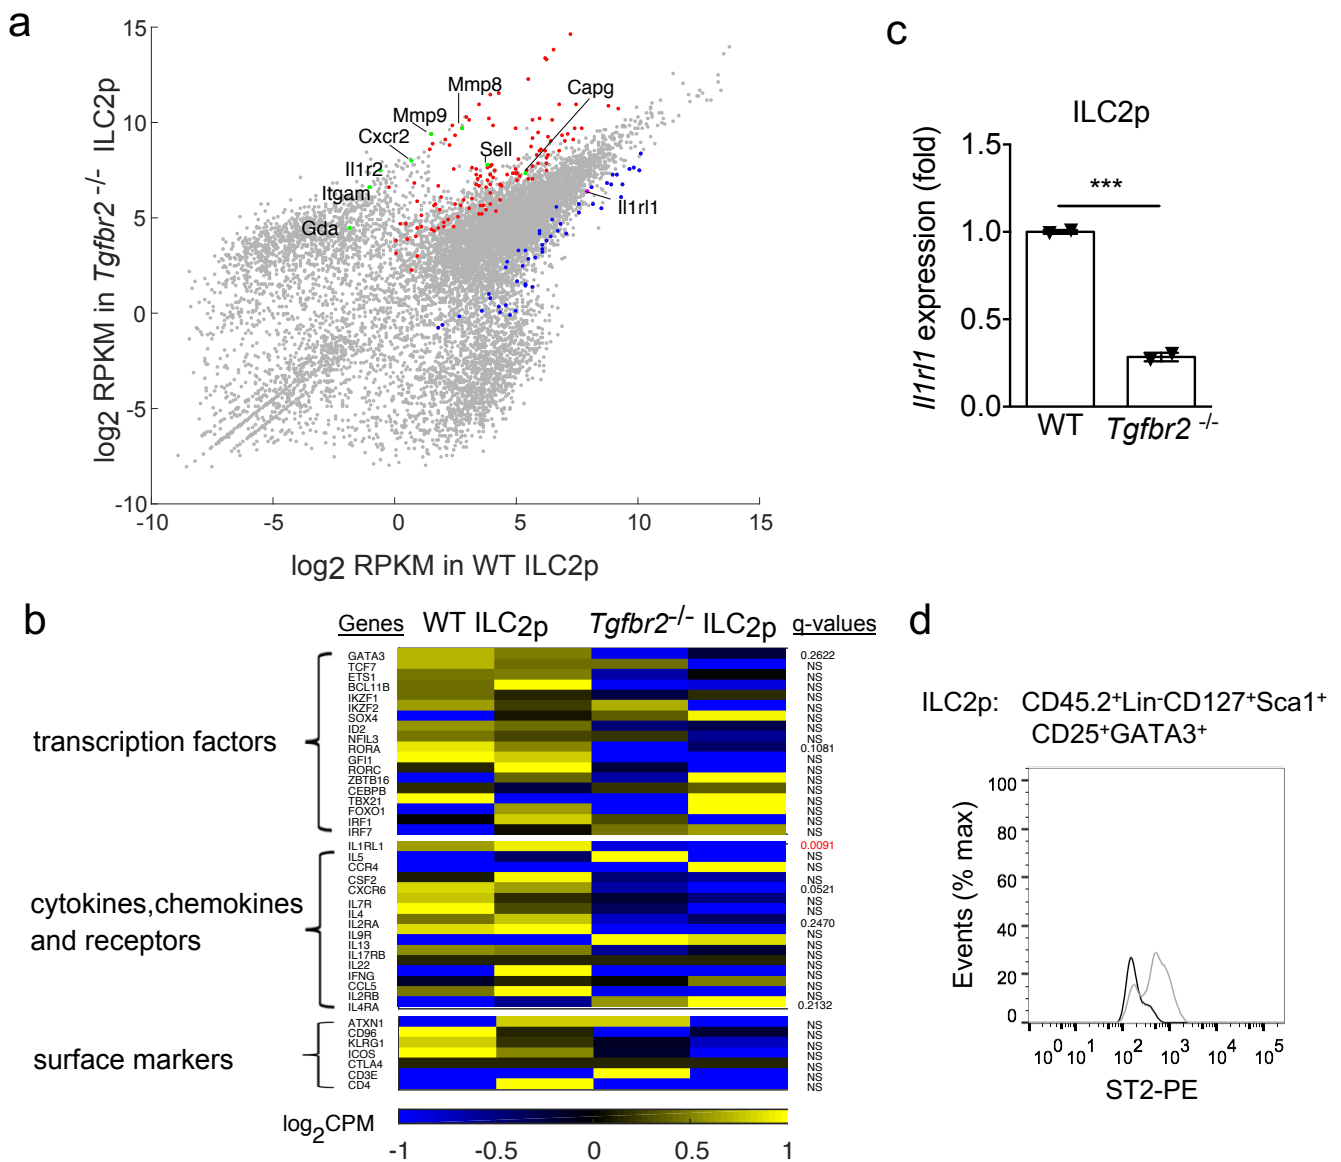

**Supplementary Figure 6. RNA-seq analysis of global transcriptome in *Tgfb2*<sup>-/-</sup>/WT ILC2p.** (a) RNA-seq analysis of sorted *Tgfb2*<sup>-/-</sup> and WT ILC2p cells (CD45.2<sup>+</sup>Lin<sup>-</sup>Flt3<sup>-</sup> $\alpha$ 4 $\beta$ 7<sup>+</sup>CD25<sup>+</sup>) in the BM of Control/CD45.1 and *Tgfb2*<sup>-/-</sup>/CD45.1 BM chimeras. Data are shown as a scatter plot of log<sub>2</sub> of FPKM (fragments per kilo base of transcript per million mapped reads) from *Tgfb2*<sup>-/-</sup> and WT ILC2p cells reconstituted for 6 weeks. Blue dots represent downregulated genes, and red dots represent upregulated genes in *Tgfb2*<sup>-/-</sup> ILC2p cells. Genes of interest are indicated and marked in purple (downregulated) and green (upregulated). (b) Heat map of the expression of select genes (left margin) in WT and *Tgfb2*<sup>-/-</sup> ILC2p cells, grouped according to the function of their products (left margin). NS, not significant ( $q$  value,  $\geq 0.2$ ) (Student's  $t$ -test, Benjamini and Hochberg correction for multiple tests). (c) Quantitative RT-PCR analysis of the *Il1r1* in the sorted *Tgfb2*<sup>-/-</sup> ILC2p cells relative to WT ILC2p cells in BM. Data is representative of 2 independent experiments. Data are shown as mean  $\pm$  SD; \*\*\*  $p < 0.001$  (Student's  $t$ -test). (d) Representative FACS histogram of ST2 expression in WT (gray line) and *Tgfb2*<sup>-/-</sup> ILC2p cells (black line).

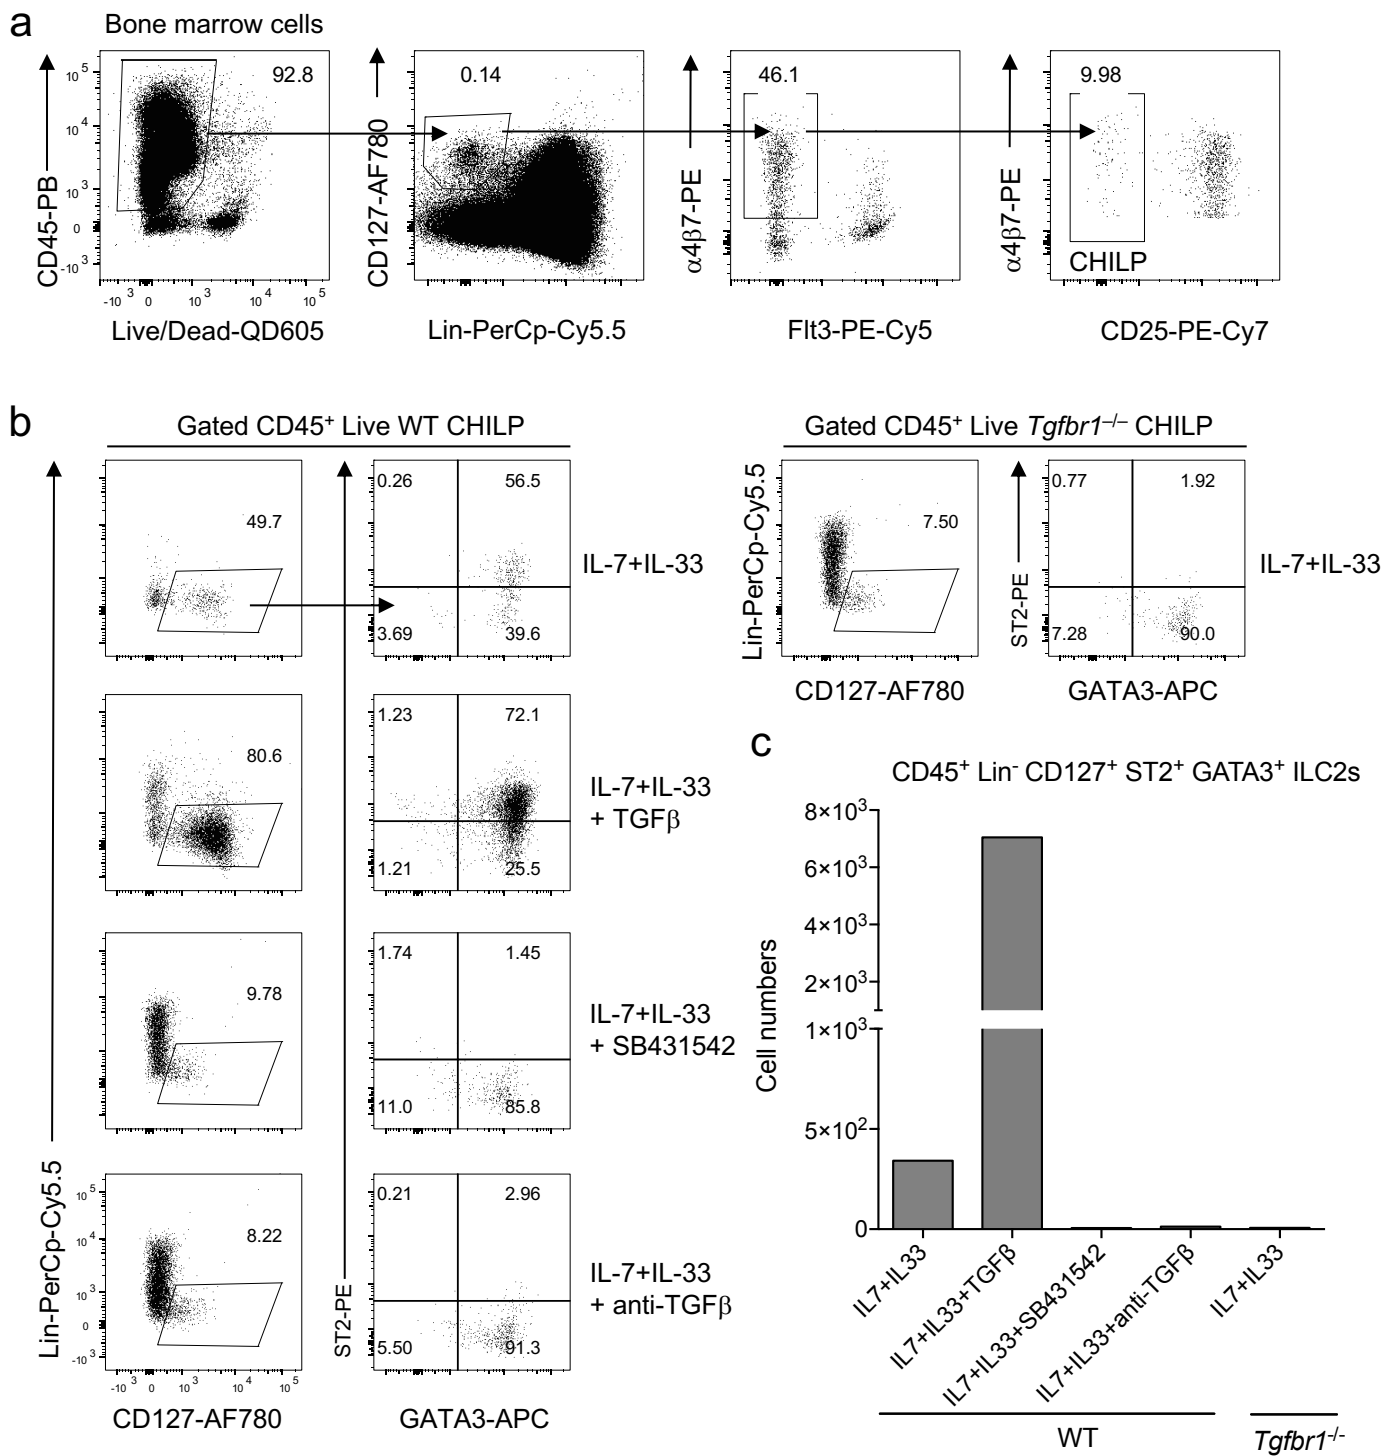

## Supplementary Figure 7. TGF- $\beta$ promotes the generation of ILC2 from CHILP in vitro

(a) Representative gating strategy for sorting of Live CD45<sup>+</sup>CD127<sup>+</sup> $\alpha$ 4 $\beta$ 7<sup>+</sup>CD25<sup>-</sup> bone marrow CHILP cells. (b) Representative FACS plots are depicting frequencies of Live CD45<sup>+</sup>Lin<sup>-</sup>CD127<sup>+</sup> or Live CD45<sup>+</sup>Lin<sup>-</sup>CD127<sup>+</sup>GATA3<sup>+</sup>ST2<sup>+</sup> ILC2 cells respectively. WT or *Tgfb1*<sup>-/-</sup> CHILP cells were co-cultured with OP9-DL1 cells in presence of IL-7 (20 ng/mL) and IL-33 (20 ng/mL) or TGF- $\beta$  (2ng/mL) or  $\beta$ TBR1 inhibitor SB431542 (5  $\mu$ M) or anti-TGF- $\beta$  (50  $\mu$ g/mL) for 13 days and analyzed using flow cytometry. (c) Summarizing figure showing total number of CD45<sup>+</sup>Lin<sup>-</sup>CD127<sup>+</sup>GATA3<sup>+</sup>ST2<sup>+</sup> (ILC2) in CHILP cultures (day 13) of WT and *Tgfb1*<sup>-/-</sup> cells. Data shown are representative of 2 (*Tgfb1*<sup>-/-</sup> CHILP) and 3 (WT CHILP) independent experiments.

BM ILC2p

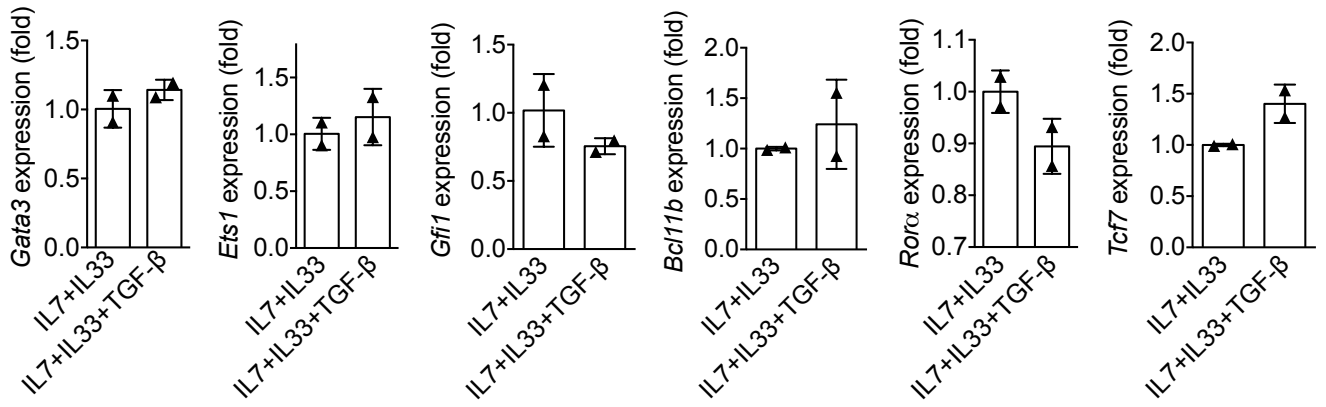

BM CHILP

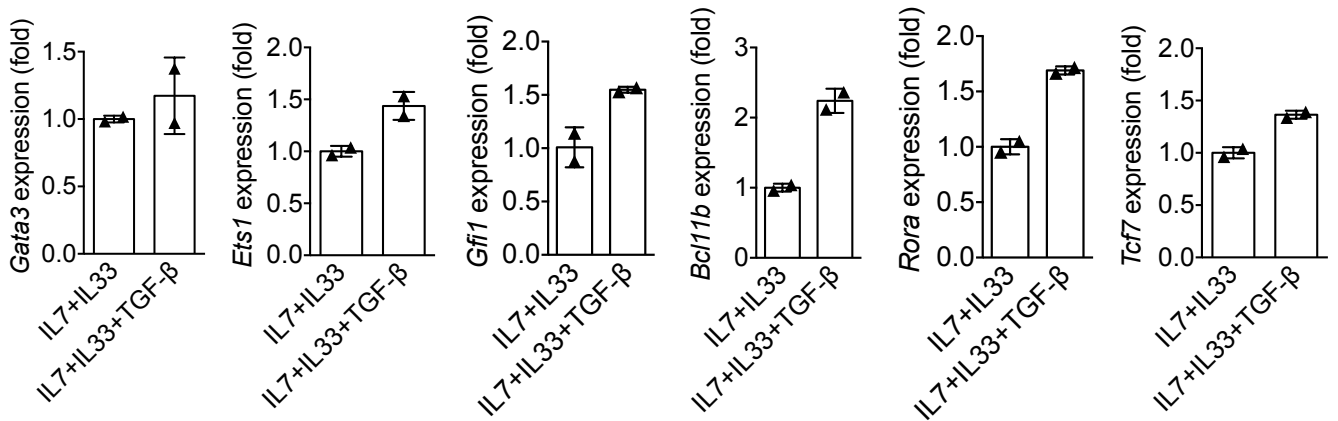

**Supplementary Figure 8. Gene expression of bone marrow ILC2p and CHILP from cultures treated with/without TGF- $\beta$  for 24 hours.**

Data are representative of one out of 2 independent experiments. Data were analyzed using qPCR and shown as mean  $\pm$  SD.

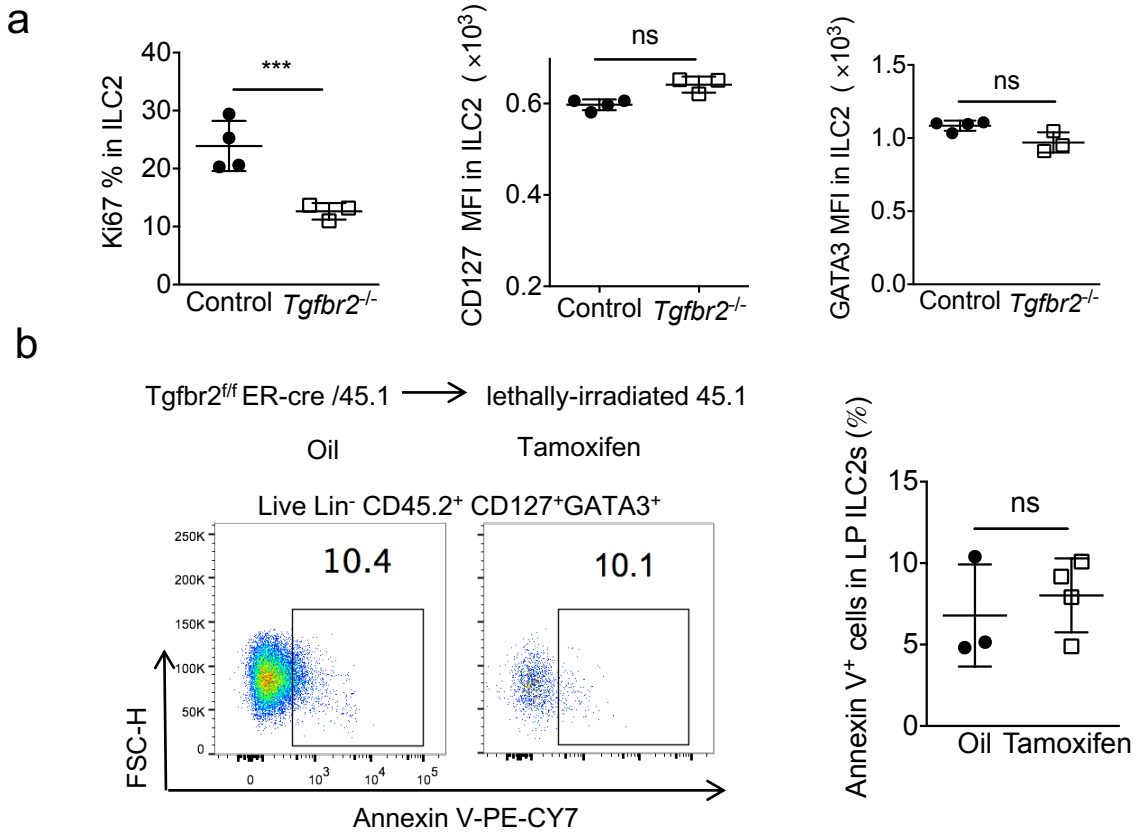

**Supplementary Figure 9. T $\beta$ R2 deletion decreases the proliferation of ILC2 cells.**

- (a) Frequency of Ki67 and MFI's of CD127 and GATA3 in mature CD45.2<sup>+</sup> ILC2 cells in the LP of Control/CD45.1 and *Tgfb2*<sup>-/-</sup> CD45.1 BM chimeras (n=3-4 mice per group).
- (b) Representative FACS plots showing Annexin-V expression on the surface of ILC2s in the LP of of *Tgfb2*<sup>ff</sup>ER-Cre<sup>+</sup>/45.1 BM chimeras post-treated with tamoxifen or oil (n=3-4 mice per group).

Data are representative of two independent experiments and presented as mean  $\pm$  SD.

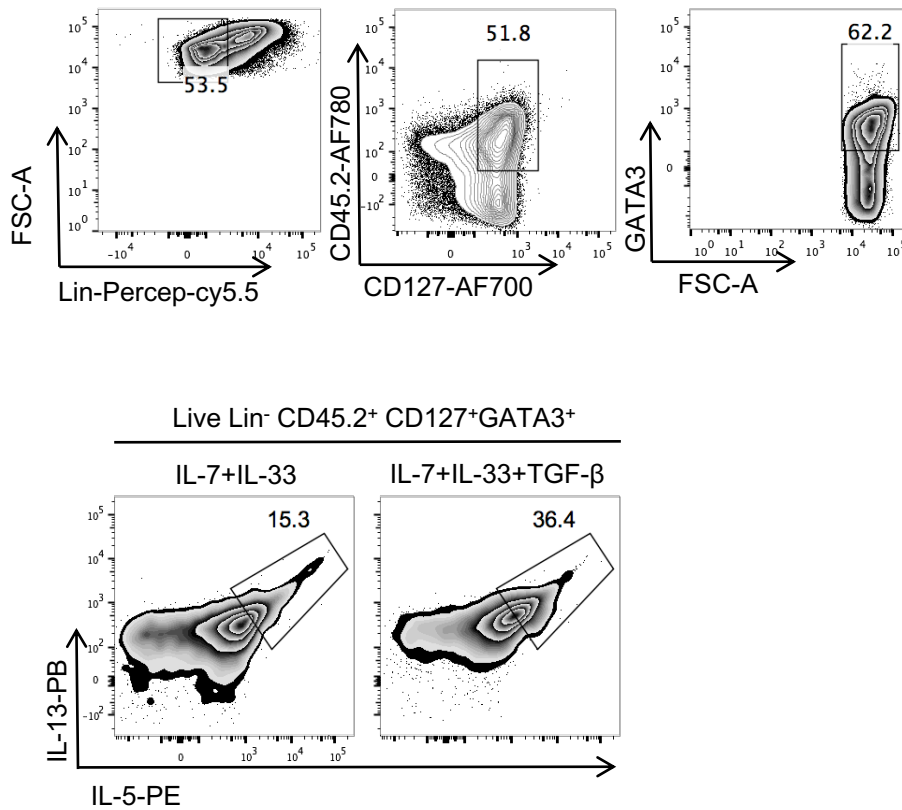

**Supplementary Figure 10. TGF- $\beta$  increases ILC2 cells production of IL-13 and IL-5 in *in vitro* culture.**

Flow cytometry profiles of cells derived from sorted WT ILC2 precursors (ILC2p; Lin<sup>-</sup> CD127<sup>+</sup>Flt3- $\alpha_4\beta_7$ <sup>+</sup>CD25<sup>+</sup>) cultured with OP9-DL1 stromal cells plus IL-7 and IL-33, in the presence or absence of rhTGF- $\beta$ 1, and analyzed for the intracellular IL-13 and IL-5 expression from ILC2s (Live CD45.2<sup>+</sup>Lin<sup>-</sup> CD127<sup>+</sup>GATA3<sup>+</sup>) stimulated with PMA plus ionomycin after 13 days of culture.

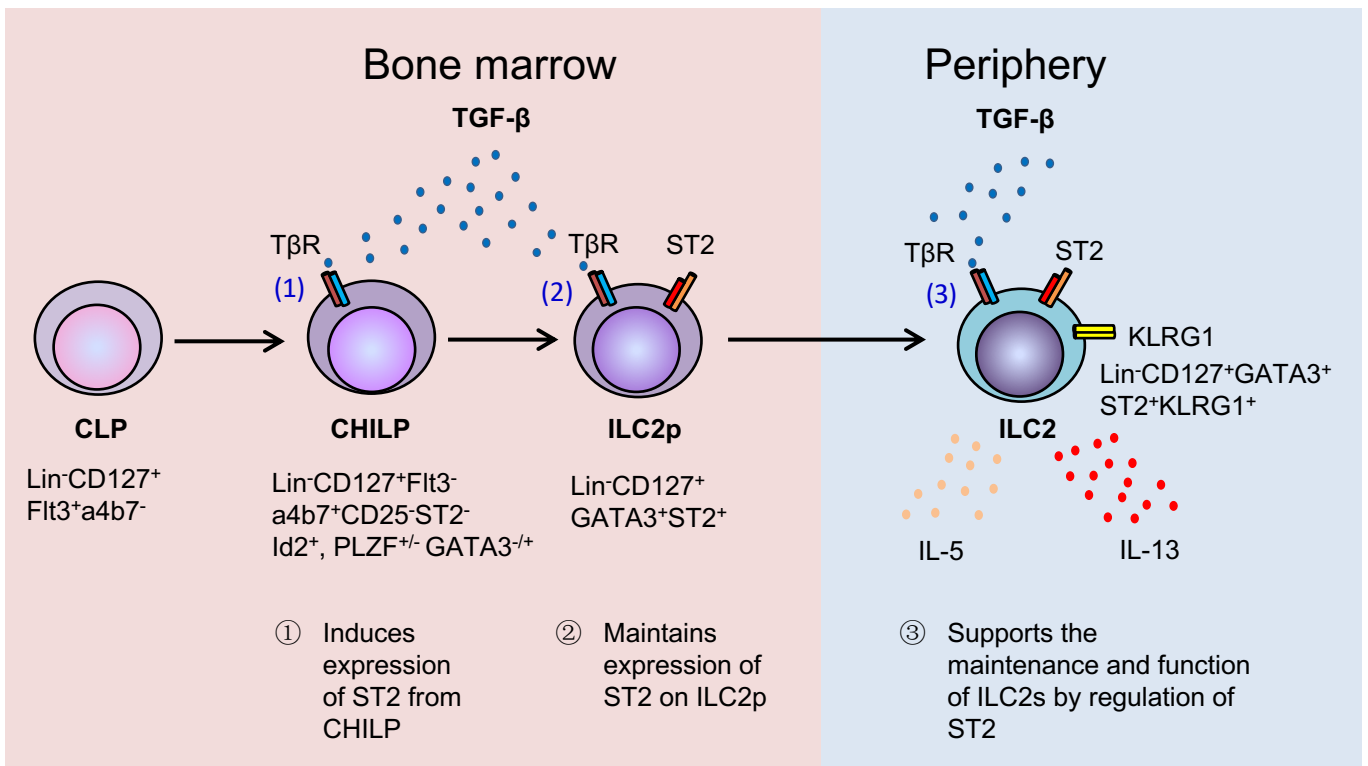

**Supplementary Fig 11. A proposed model for the role of TGF- $\beta$  in the development of ILC2 cells from their BM precursors.**

- (1) TGF- $\beta$  signaling is essential for the induction of ST2 on CHILP cells and enhances the development and generation of ST2<sup>+</sup> ILC2p cells
- (2) Once ILC2p (ST2 positive) are generated, TGF- $\beta$  signaling is needed to maintain ST2 expression at high level, which may regulate ILC2p differentiation/proliferation into ILC2;
- (3) TGF- $\beta$  signaling supports the maintenance and the function of mature ILC2 in the periphery by regulating their ST2 expression.

Supplementary Table 1: Surface markers for identification and sorting of the indicated cell subsets

| Name                                                                          | Identifying markers for sorting                                                                                                                                                                                         | Cell subsets             |
|-------------------------------------------------------------------------------|-------------------------------------------------------------------------------------------------------------------------------------------------------------------------------------------------------------------------|--------------------------|
| CLP                                                                           | CD45 <sup>+</sup> Lin <sup>-</sup> CD127 <sup>+</sup> Flt3 <sup>+</sup> $\alpha_4\beta_7$ <sup>-</sup>                                                                                                                  | T, B, ILC potential      |
| Lin <sup>-</sup> $\alpha_4\beta_7$ <sup>+</sup> progenitors                   | CD45 <sup>+</sup> Lin <sup>-</sup> CD127 <sup>+</sup> Flt3 <sup>-</sup> $\alpha_4\beta_7$ <sup>+</sup>                                                                                                                  | ILC potential            |
| Lin <sup>-</sup> $\alpha_4\beta_7$ <sup>+</sup> CD25 <sup>-</sup> progenitors | CD45 <sup>+</sup> Lin <sup>-</sup> CD127 <sup>+</sup> Flt3 <sup>-</sup> $\alpha_4\beta_7$ <sup>+</sup> CD25 <sup>-</sup>                                                                                                | Includes CHILP           |
| Lin <sup>-</sup> $\alpha_4\beta_7$ <sup>+</sup> CD25 <sup>+</sup> progenitors | CD45 <sup>+</sup> Lin <sup>-</sup> CD127 <sup>+</sup> Flt3 <sup>-</sup> $\alpha_4\beta_7$ <sup>+</sup> CD25 <sup>+</sup>                                                                                                | Contains ILC2 progenitor |
| ILC2p                                                                         | CD45 <sup>+</sup> Lin <sup>-</sup> CD127 <sup>+</sup> Flt3 <sup>-</sup> $\alpha_4\beta_7$ <sup>+</sup> CD25 <sup>+</sup> Sca1 <sup>+</sup> CD117 <sup>-</sup> GATA3 <sup>+</sup>                                        | ILC2 progenitor          |
| cNKp                                                                          | CD45 <sup>+</sup> Lin <sup>-</sup> NK1.1 <sup>+</sup> NKp46 <sup>+</sup> CD127 <sup>-</sup>                                                                                                                             | cNK precursor            |
| ILC1/3p                                                                       | CD45 <sup>+</sup> Lin <sup>-</sup> NK1.1 <sup>+</sup> NKp46 <sup>+</sup> CD127 <sup>+</sup>                                                                                                                             | ILC1/3 precursor         |
| Liver NK/ILC1                                                                 | CD45 <sup>+</sup> Lin <sup>-</sup> NK1.1 <sup>+</sup> NKp46 <sup>+</sup>                                                                                                                                                | Mature NK and ILC1       |
| LP ILC1                                                                       | CD45 <sup>+</sup> Lin <sup>-</sup> CD127 <sup>+</sup> Tbet <sup>+</sup>                                                                                                                                                 | Mature ILC1              |
| LP ILC2                                                                       | CD45 <sup>+</sup> Lin <sup>-</sup> CD127 <sup>+</sup> GATA3 <sup>+</sup> (analysis)<br>or CD45 <sup>+</sup> Lin <sup>-</sup> CD127 <sup>+</sup> Sca1 <sup>+</sup> CD25 <sup>+</sup> KIRG1 <sup>+</sup> (sorting)        | Mature ILC2              |
| LP ILC3                                                                       | CD45 <sup>+</sup> Lin <sup>-</sup> CD127 <sup>+</sup> ROR $\gamma$ <sup>+</sup> (analysis)<br>or CD45 <sup>+</sup> Lin <sup>-</sup> CD127 <sup>+</sup> CD117 <sup>+</sup> Sca1 <sup>-</sup> CD25 <sup>-</sup> (sorting) | Mature ILC3              |
| Lung ILC2                                                                     | CD45 <sup>+</sup> Lin <sup>-</sup> CD127 <sup>+</sup> Sca1 <sup>+</sup> CD25 <sup>+</sup> ST2 <sup>+</sup> GATA3 <sup>+</sup>                                                                                           | Mature ILC2              |

Supplementary Table 2: Antibodies used in this study

| <b>Fluorescein</b>   | <b>Name (clone)</b>                                                                                                                                           |
|----------------------|---------------------------------------------------------------------------------------------------------------------------------------------------------------|
| Percep-cy5.5         | CD3 $\epsilon$ (145-2C11), CD5 (53-7.3), CD11b (M1/70), CD11c (N418), CD19 (1D3), B220 (RA3-6B2), Gr-1 (RB6-8C5), Nk1.1 (PK136), NKp46 (29A1.4), CD23 (MAR-1) |
| APC                  | CD25 (7D4), CD127 (A7R34), ST2 (RMST2-2), GATA3 (TWAJ), ROR $\gamma$ t (B2D), Tbet (eBio4B107), IL-22 (IL22JOP), IL-13 (eBio13A), PLZF (9E12)                 |
| PE                   | CD45 (C363.16A), $\alpha$ 4 $\beta$ 7 (DATK32), NK1.1, ST2 (RMST2-2), GATA3 (TWAJ), ROR $\gamma$ t (B2D), Tbet (eBio4B107), IL-5 (TRFK5), IL-17 (eBio17B7),   |
| AF-700               | CD127 (A7R34), CD49b (DX5)                                                                                                                                    |
| PE-CY7               | CD25 (PC61.5), Annexin-V, NK1.1 (PK136)                                                                                                                       |
| PE-CY5               | Flt3 (A2F10)                                                                                                                                                  |
| FITC (AF488)         | CD45 (30-F11), CD45.2 (104), CD45.1 (A20), CD25 (eBio7D4), Sca1 (D7), CD27 (LG.3A10), PLZF (Mags.21F7), GATA3 (TWAJ)                                          |
| AF780                | CD45.2 (104), CD127 (A7R34)                                                                                                                                   |
| Pacific blue (eF450) | CD45.1 (A20), NKp46 (29A1.4), CD117 (2B8), ID2 (ILCID2)                                                                                                       |
| PE-ef610             | Ki67 (SolA15)                                                                                                                                                 |
| BV510                | KLRG-1 (MAFA)                                                                                                                                                 |
| QD605                | Zombie yellow                                                                                                                                                 |
|                      | anti-CD16/CD32 (93)                                                                                                                                           |
